# Supplementary material
Source: Springer Nature journal article supplement (https://www.springermedizin.de/resource/supplementary/12916_2013_849_MOESM6_ESM.pdf/9598470)
Supplement: MOESM6 [file 9598470]

Assessed for eligibility (n=377)

Excluded (n= 164)

- Deemed not appropriate by ICU staff e.g. relative very distressed (n=10)
- <12hr admission (n=14)
- Patient has no relatives (n=11)
- Insufficient English (n=4)
- Private patient (n=3)
- Relatives not present on 3 occasions to give questionnaire to (n=122)

Eligible and questionnaires given (n=213)

Questionnaires not returned (n=48)

- Relatives not located to retrieve questionnaire (28)
- Insufficient English (n=4)
- Completed questionnaire lost on unit (n=4)
- Discharge from hospital prior to completion (n=8)
- Declined to participate (n=4)

Questionnaires returned (n=165)

Questionnaires excluded (n=7)

- Completed by patient (n=3)
- No questions answered (n=4)

Analysed (n=158)
